# Supplementary material for: Formation of graphitic tubules from ordered mesoporous carbon and their effect on supercapacitive energy storage
Source: Royal Society of Chemistry journal article supplement (doi:10.1039/c2jm33889k), 2012-01-01
Supplement: c2jm33889k.pdf [file c2jm33889k.pdf]

## Supporting Information

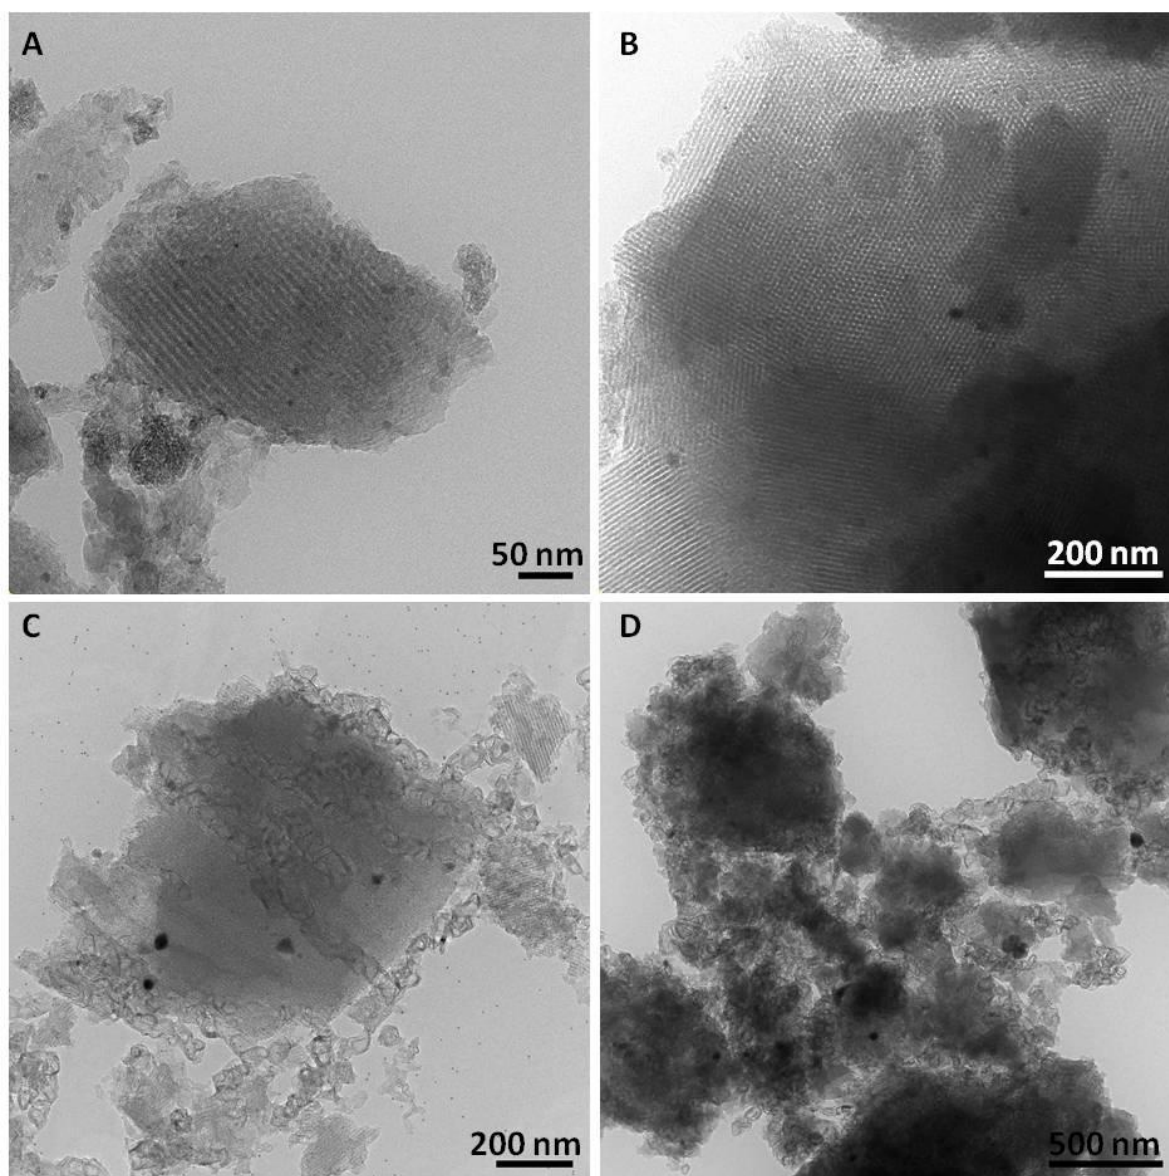

**Figure S1.** TEM images (A-D) of OMCs pyrolysed at 700, 800, 900 and 1000 °C.

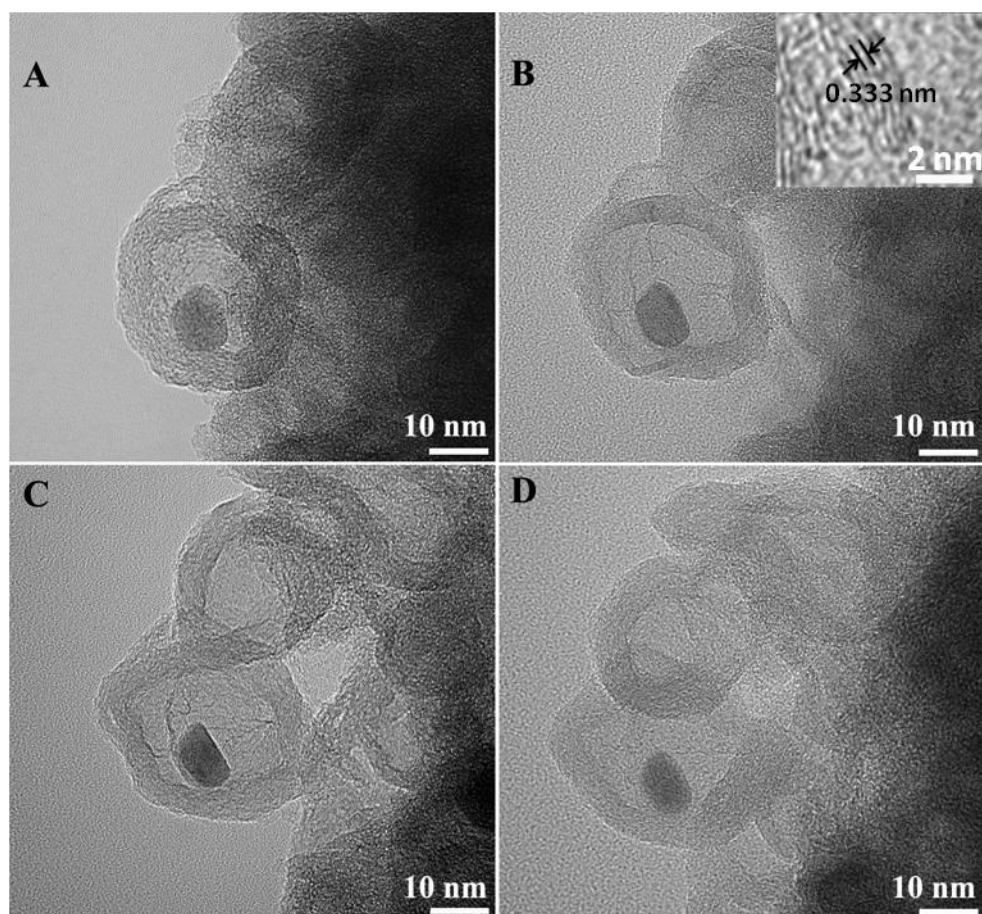

**Figure S2.** TEM images of a typical carbon nano-coil containing iron oxide in the carbon material treated at 900 °C taken in different tilting angles: -20° (A), 0° (B), +20° (C), and +40° (D). Inset of B is the high resolution TEM image which confirms the graphite structure with the  $d_{002}$  spacing of 0.333 nm, in accordance with the XRD results.

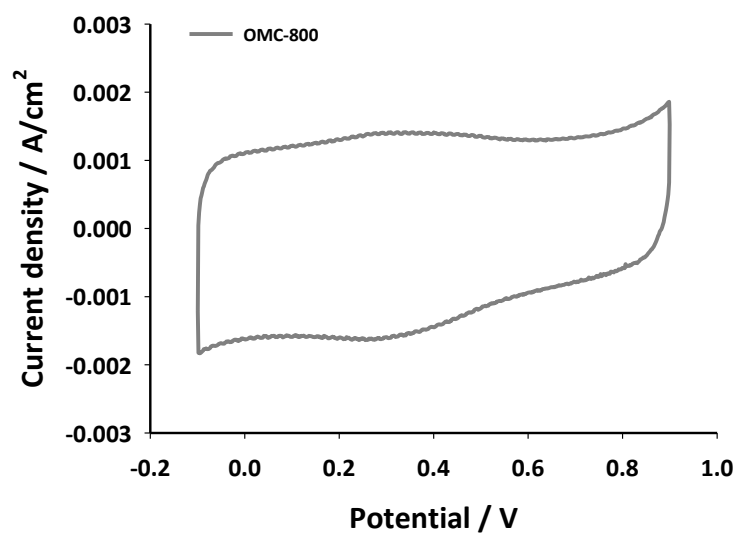

**Figure S3.** Cyclic voltammogram of OMC-800 recorded before cycling measurements in three-electrode cell at a scan rate of 5 mV/s in 1M H<sub>2</sub>SO<sub>4</sub>.

Supporting movies are available from the authors.
